# Supplementary material for: Clinical leaders and providers’ perspectives on delivering medications for the treatment of opioid use disorder in Veteran Affairs’ facilities
Source: Springer Nature journal article supplement (doi:10.1186/s13722-021-00263-5), 2021-09-06
Supplement: MOESM1 [file 19636836]

## VA Stepped Care for Opioid Use Disorder Train-the-Trainer (SCOUTT) Initiative - Follow Up Survey

**Thank you for agreeing to take part in this survey!**

**As part of a larger evaluation of the Stepped Care for Opioid Use Disorder Train-the-Trainer (SCOUTT) roll out across the VA, we would like to learn more about the providers involved in SCOUTT and their perspectives on treating opioid use disorder (OUD) over the first year of implementation. Participation is voluntary and you have the option to not respond to any questions that you choose. The survey should take 7-10 minutes to complete. Your responses are anonymous, and will be shared only in aggregate to improve the quality of Veterans' care.**

**Definitions of acronyms in this survey:**

- **OUD = Opioid Use Disorder**
- **SUD = Substance Use Disorder**
- **SCOUTT = Stepped Care for Opioid Use Disorder Train-the-Trainer Initiative**
- **M-OUD = Medication treatment for opioid use disorder is the use of medications (e.g., buprenorphine or naltrexone) in combination with medication management and behavioral therapies**

## VA Stepped Care for Opioid Use Disorder Train-the-Trainer (SCOUTT) Initiative - Follow Up Survey

1. What is your age?

- 25 - 34
- 35 - 44
- 45 - 54
- 55 - 64
- 65+

2. What is your gender?

- Male
- Female

3. Years of VA practice:

- ≤ 5
- 5 - 10
- 11 - 20
- 20+

4. Total years of practice:

- ≤ 5
- 5 - 10
- 11 - 20
- 20+

5. Are you of Hispanic, Latino, or Spanish origin?

- Yes
- No

6. Which race best describes you?

- American Indian or Alaska Native
- Asian
- Native Hawaiian or Other Pacific Islander
- Black or African American
- White or Caucasian
- Multiple ethnicity or Other (please specify)

7. In which VISN do you work?

8. Please select your discipline:

- Nurse
- Nurse Practitioner
- Pharmacist
- Physician
- Physician Assistant
- Psychologist
- Social Worker
- Addiction Therapist
- Other (please specify)

9. Please select your specialty:

- Primary Care/General Internal Medicine/Family Medicine
- Medical Specialty Care
- Mental Health
- Pain Management
- Substance Use Disorder Specialty Care
- Not Applicable (not a clinical care provider)
- Other (please specify)

10. Please select your primary facility role:

- Pharmacist
- Prescribing Clinician
- Non-prescribing Clinician
- Leadership (defined as Clinic Director or higher level administrator)

11. Are you a prescriber?

- Yes
- No

VA Stepped Care for Opioid Use Disorder Train-the-Trainer (SCOUTT) Initiative - Follow Up Survey

12. Are you waived by the DEA to prescribe buprenorphine?

- Yes
- No

VA Stepped Care for Opioid Use Disorder Train-the-Trainer (SCOUTT) Initiative - Follow Up Survey

13. Have you prescribed buprenorphine to treat OUD in the last 12 months?

- Yes
- No

VA Stepped Care for Opioid Use Disorder Train-the-Trainer (SCOUTT) Initiative - Follow Up Survey

14. How would you rate your experience with prescribing buprenorphine to treat OUD?

|                       |                       |                       |                       |                            |                       |                       |                       |                       |                       |
|-----------------------|-----------------------|-----------------------|-----------------------|----------------------------|-----------------------|-----------------------|-----------------------|-----------------------|-----------------------|
| 1 (No experience)     | 2                     | 3                     | 4                     | 5 (Moderately experienced) | 6                     | 7                     | 8                     | 9                     | 10 (Very experienced) |
| <input type="radio"/> | <input type="radio"/> | <input type="radio"/> | <input type="radio"/> | <input type="radio"/>      | <input type="radio"/> | <input type="radio"/> | <input type="radio"/> | <input type="radio"/> | <input type="radio"/> |

VA Stepped Care for Opioid Use Disorder Train-the-Trainer (SCOUTT) Initiative - Follow Up Survey

15. Have you prescribed naltrexone to treat OUD in the last 12 months?

- Yes
- No

VA Stepped Care for Opioid Use Disorder Train-the-Trainer (SCOUTT) Initiative - Follow Up Survey

16. How would you rate your experience with prescribing naltrexone to treat OUD?

| 1 (No experience)     | 2                     | 3                     | 4                     | 5 (Moderately experienced) | 6                     | 7                     | 8                     | 9                     | 10 (Very experienced) |
|-----------------------|-----------------------|-----------------------|-----------------------|----------------------------|-----------------------|-----------------------|-----------------------|-----------------------|-----------------------|
| <input type="radio"/> | <input type="radio"/> | <input type="radio"/> | <input type="radio"/> | <input type="radio"/>      | <input type="radio"/> | <input type="radio"/> | <input type="radio"/> | <input type="radio"/> | <input type="radio"/> |

VA Stepped Care for Opioid Use Disorder Train-the-Trainer (SCOUTT) Initiative - Follow Up Survey

17. On a scale from 1 (not prepared at all) to 10 (very prepared), how prepared are you to:

|                                                  | 1                     | 2                     | 3                     | 4                     | 5                     | 6                     | 7                     | 8                     | 9                     | 10                    | N/A                   |
|--------------------------------------------------|-----------------------|-----------------------|-----------------------|-----------------------|-----------------------|-----------------------|-----------------------|-----------------------|-----------------------|-----------------------|-----------------------|
| assess patients for OUD                          | <input type="radio"/> | <input type="radio"/> | <input type="radio"/> | <input type="radio"/> | <input type="radio"/> | <input type="radio"/> | <input type="radio"/> | <input type="radio"/> | <input type="radio"/> | <input type="radio"/> | <input type="radio"/> |
| diagnose OUD                                     | <input type="radio"/> | <input type="radio"/> | <input type="radio"/> | <input type="radio"/> | <input type="radio"/> | <input type="radio"/> | <input type="radio"/> | <input type="radio"/> | <input type="radio"/> | <input type="radio"/> | <input type="radio"/> |
| educate patients about treatment options for OUD | <input type="radio"/> | <input type="radio"/> | <input type="radio"/> | <input type="radio"/> | <input type="radio"/> | <input type="radio"/> | <input type="radio"/> | <input type="radio"/> | <input type="radio"/> | <input type="radio"/> | <input type="radio"/> |

18. On a scale from 1 (not prepared at all) to 10 (very prepared), how prepared is your clinic to:

|                                          | 1                     | 2                     | 3                     | 4                     | 5                     | 6                     | 7                     | 8                     | 9                     | 10                    |
|------------------------------------------|-----------------------|-----------------------|-----------------------|-----------------------|-----------------------|-----------------------|-----------------------|-----------------------|-----------------------|-----------------------|
| provide medications for treatment of OUD | <input type="radio"/> | <input type="radio"/> | <input type="radio"/> | <input type="radio"/> | <input type="radio"/> | <input type="radio"/> | <input type="radio"/> | <input type="radio"/> | <input type="radio"/> | <input type="radio"/> |

VA Stepped Care for Opioid Use Disorder Train-the-Trainer (SCOUTT) Initiative - Follow Up Survey

19. Please indicate your level of agreement with the following statements about your clinic's functioning:

|                                                                                                                       | Strongly Disagree     | Disagree              | Neither Agree nor Disagree | Agree                 | Strongly Agree        | N/A                   |
|-----------------------------------------------------------------------------------------------------------------------|-----------------------|-----------------------|----------------------------|-----------------------|-----------------------|-----------------------|
| Overall, our team has done its work well this last month                                                              | <input type="radio"/> | <input type="radio"/> | <input type="radio"/>      | <input type="radio"/> | <input type="radio"/> | <input type="radio"/> |
| In general, SCOUTT implementation clinics deliver high quality M- OUD services                                        | <input type="radio"/> | <input type="radio"/> | <input type="radio"/>      | <input type="radio"/> | <input type="radio"/> | <input type="radio"/> |
| Members of our team depend on each other to deliver M-OUD services                                                    | <input type="radio"/> | <input type="radio"/> | <input type="radio"/>      | <input type="radio"/> | <input type="radio"/> | <input type="radio"/> |
| We are a team of people with a shared task – not a collection of individuals who have their own particular jobs to do | <input type="radio"/> | <input type="radio"/> | <input type="radio"/>      | <input type="radio"/> | <input type="radio"/> | <input type="radio"/> |
| In general, members of our team would agree that we have worked well as a team this past month                        | <input type="radio"/> | <input type="radio"/> | <input type="radio"/>      | <input type="radio"/> | <input type="radio"/> | <input type="radio"/> |
| Overall, the different patient-related jobs and activities that everyone does on this team fit together very well     | <input type="radio"/> | <input type="radio"/> | <input type="radio"/>      | <input type="radio"/> | <input type="radio"/> | <input type="radio"/> |

20. What challenges have you faced in your role as a SCOUTT implementation clinic provider?

21. To what extent have your clinic's practices changed as a result of the SCOUTT roll-out across the VA?

- Not at all
- Slightly
- Moderately
- Quite a Bit
- Extremely

VA Stepped Care for Opioid Use Disorder Train-the-Trainer (SCOUTT) Initiative - Follow Up Survey

22. Please specify how you clinic's practices have changed?

VA Stepped Care for Opioid Use Disorder Train-the-Trainer (SCOUTT) Initiative - Follow Up Survey

23. Delivering medications (buprenorphine or naltrexone) to treat OUD in my clinic:

|                                                             | Strongly Disagree     | Disagree              | Neither Agree nor Disagree | Agree                 | Strongly Agree        |
|-------------------------------------------------------------|-----------------------|-----------------------|----------------------------|-----------------------|-----------------------|
| is important                                                | <input type="radio"/> | <input type="radio"/> | <input type="radio"/>      | <input type="radio"/> | <input type="radio"/> |
| will save lives                                             | <input type="radio"/> | <input type="radio"/> | <input type="radio"/>      | <input type="radio"/> | <input type="radio"/> |
| is time consuming                                           | <input type="radio"/> | <input type="radio"/> | <input type="radio"/>      | <input type="radio"/> | <input type="radio"/> |
| detracts from my clinical responsibilities                  | <input type="radio"/> | <input type="radio"/> | <input type="radio"/>      | <input type="radio"/> | <input type="radio"/> |
| is more dangerous than management of other chronic diseases | <input type="radio"/> | <input type="radio"/> | <input type="radio"/>      | <input type="radio"/> | <input type="radio"/> |
| can be done successfully                                    | <input type="radio"/> | <input type="radio"/> | <input type="radio"/>      | <input type="radio"/> | <input type="radio"/> |

24. Delivering medications (buprenorphine or naltrexone) to treat OUD in my clinic:

|                                                                              | Strongly Disagree     | Disagree              | Neither Agree nor Disagree | Agree                 | Strongly Agree        |
|------------------------------------------------------------------------------|-----------------------|-----------------------|----------------------------|-----------------------|-----------------------|
| is supported by randomized clinical trials or other scientific evidence      | <input type="radio"/> | <input type="radio"/> | <input type="radio"/>      | <input type="radio"/> | <input type="radio"/> |
| conforms to the opinions of clinical experts in my clinic                    | <input type="radio"/> | <input type="radio"/> | <input type="radio"/>      | <input type="radio"/> | <input type="radio"/> |
| is consistent with clinical practices that have been accepted by VA patients | <input type="radio"/> | <input type="radio"/> | <input type="radio"/>      | <input type="radio"/> | <input type="radio"/> |
| fills an important gap in the care my clinic provides                        | <input type="radio"/> | <input type="radio"/> | <input type="radio"/>      | <input type="radio"/> | <input type="radio"/> |
| can be integrated into my clinic's procedures and workflow                   | <input type="radio"/> | <input type="radio"/> | <input type="radio"/>      | <input type="radio"/> | <input type="radio"/> |
| is compatible with the care provided by my clinic                            | <input type="radio"/> | <input type="radio"/> | <input type="radio"/>      | <input type="radio"/> | <input type="radio"/> |

VA Stepped Care for Opioid Use Disorder Train-the-Trainer (SCOUTT) Initiative - Follow Up Survey

25. Please indicate your level of agreement or disagreement with the following statements:

|                                                                      | Strongly Disagree     | Disagree              | Neither Agree nor Disagree | Agree                 | Strongly Agree        |
|----------------------------------------------------------------------|-----------------------|-----------------------|----------------------------|-----------------------|-----------------------|
| The risk of patients diverting these medications is too high         | <input type="radio"/> | <input type="radio"/> | <input type="radio"/>      | <input type="radio"/> | <input type="radio"/> |
| Providers in my clinic want to prescribe buprenorphine or naltrexone | <input type="radio"/> | <input type="radio"/> | <input type="radio"/>      | <input type="radio"/> | <input type="radio"/> |

VA Stepped Care for Opioid Use Disorder Train-the-Trainer (SCOUTT) Initiative - Follow Up Survey



26. Please indicate your level of agreement or disagreement with each of the following statements about working with people who use illicit or legal opioids in a non-therapeutic way:

|                                                                                                                                                  | 1<br>(Strongly<br>Agree) | 2                     | 3                     | 4 (Neither<br>Agree nor<br>Disagree) | 5                     | 6                     | 7<br>(Strongly<br>Disagree) |
|--------------------------------------------------------------------------------------------------------------------------------------------------|--------------------------|-----------------------|-----------------------|--------------------------------------|-----------------------|-----------------------|-----------------------------|
| I feel I have a working knowledge of opioids and opioid-related problems.                                                                        | <input type="radio"/>    | <input type="radio"/> | <input type="radio"/> | <input type="radio"/>                | <input type="radio"/> | <input type="radio"/> | <input type="radio"/>       |
| I feel I know enough about the causes of drug problems to carry out my role when working with opioid users.                                      | <input type="radio"/>    | <input type="radio"/> | <input type="radio"/> | <input type="radio"/>                | <input type="radio"/> | <input type="radio"/> | <input type="radio"/>       |
| I feel I know enough about the physical effects of drug use to carry out my role when working with opioid users.                                 | <input type="radio"/>    | <input type="radio"/> | <input type="radio"/> | <input type="radio"/>                | <input type="radio"/> | <input type="radio"/> | <input type="radio"/>       |
| I feel I know enough about the psychological effects of drugs to carry out my role when working with opioid users.                               | <input type="radio"/>    | <input type="radio"/> | <input type="radio"/> | <input type="radio"/>                | <input type="radio"/> | <input type="radio"/> | <input type="radio"/>       |
| I feel I know enough about the factors which put people at risk of developing drug problems to carry out my role when working with opioid users. | <input type="radio"/>    | <input type="radio"/> | <input type="radio"/> | <input type="radio"/>                | <input type="radio"/> | <input type="radio"/> | <input type="radio"/>       |

27. Please indicate your level of agreement or disagreement with each of the following statements about working with people who use illicit or legal opioids in a non-therapeutic way:

|                                                                                                                | 1<br>(Strongly<br>Agree) | 2                     | 3                     | 4 (Neither<br>Agree nor<br>Disagree) | 5                     | 6                     | 7<br>(Strongly<br>Disagree) |
|----------------------------------------------------------------------------------------------------------------|--------------------------|-----------------------|-----------------------|--------------------------------------|-----------------------|-----------------------|-----------------------------|
| I feel I know how to counsel opioid users over the long-term.                                                  | <input type="radio"/>    | <input type="radio"/> | <input type="radio"/> | <input type="radio"/>                | <input type="radio"/> | <input type="radio"/> | <input type="radio"/>       |
| I feel I can appropriately advise my patients about opioids and their effects.                                 | <input type="radio"/>    | <input type="radio"/> | <input type="radio"/> | <input type="radio"/>                | <input type="radio"/> | <input type="radio"/> | <input type="radio"/>       |
| I feel I have the right to ask patients questions about their opioid use when necessary.                       | <input type="radio"/>    | <input type="radio"/> | <input type="radio"/> | <input type="radio"/>                | <input type="radio"/> | <input type="radio"/> | <input type="radio"/>       |
| I feel I have the right to ask patients for any information that is relevant to their opioid-related problems. | <input type="radio"/>    | <input type="radio"/> | <input type="radio"/> | <input type="radio"/>                | <input type="radio"/> | <input type="radio"/> | <input type="radio"/>       |

28. Please indicate your level of agreement or disagreement with each of the following statements about working with people who use illicit or legal opioids in a non-therapeutic way:

|                                                                                                                                                            | 1<br>(Strongly<br>Agree) | 2                     | 3                     | 4 (Neither<br>Agree nor<br>Disagree) | 5                     | 6                     | 7<br>(Strongly<br>Disagree) |
|------------------------------------------------------------------------------------------------------------------------------------------------------------|--------------------------|-----------------------|-----------------------|--------------------------------------|-----------------------|-----------------------|-----------------------------|
| If I felt the need when working with opioid users, I could easily find someone with whom I could discuss any personal difficulties that I might encounter. | <input type="radio"/>    | <input type="radio"/> | <input type="radio"/> | <input type="radio"/>                | <input type="radio"/> | <input type="radio"/> | <input type="radio"/>       |
| If I felt the need when working with opioid users, I could easily find someone who would help me clarify my professional responsibilities.                 | <input type="radio"/>    | <input type="radio"/> | <input type="radio"/> | <input type="radio"/>                | <input type="radio"/> | <input type="radio"/> | <input type="radio"/>       |
| If I felt the need, I could easily find someone who would be able to help me formulate the best approach for an opioid user.                               | <input type="radio"/>    | <input type="radio"/> | <input type="radio"/> | <input type="radio"/>                | <input type="radio"/> | <input type="radio"/> | <input type="radio"/>       |
| I feel that there is little I can do to help opioid users.                                                                                                 | <input type="radio"/>    | <input type="radio"/> | <input type="radio"/> | <input type="radio"/>                | <input type="radio"/> | <input type="radio"/> | <input type="radio"/>       |
| I feel I am able to work with opioid users as well as other patient groups.                                                                                | <input type="radio"/>    | <input type="radio"/> | <input type="radio"/> | <input type="radio"/>                | <input type="radio"/> | <input type="radio"/> | <input type="radio"/>       |

29. Please indicate your level of agreement or disagreement with each of the following statements about working with people who use illicit or legal opioids in a non-therapeutic way:

|                                                                                            | 1<br>(Strongly<br>Agree) | 2                     | 3                     | 4 (Neither<br>Agree nor<br>Disagree) | 5                     | 6                     | 7<br>(Strongly<br>Disagree) |
|--------------------------------------------------------------------------------------------|--------------------------|-----------------------|-----------------------|--------------------------------------|-----------------------|-----------------------|-----------------------------|
| In general, I have less respect for opioid users than for most other patients I work with. | <input type="radio"/>    | <input type="radio"/> | <input type="radio"/> | <input type="radio"/>                | <input type="radio"/> | <input type="radio"/> | <input type="radio"/>       |
| In general, one can get satisfaction from working with opioid users.                       | <input type="radio"/>    | <input type="radio"/> | <input type="radio"/> | <input type="radio"/>                | <input type="radio"/> | <input type="radio"/> | <input type="radio"/>       |
| In general, it is rewarding to work with opioid users.                                     | <input type="radio"/>    | <input type="radio"/> | <input type="radio"/> | <input type="radio"/>                | <input type="radio"/> | <input type="radio"/> | <input type="radio"/>       |
| In general, I feel I can understand opioid users.                                          | <input type="radio"/>    | <input type="radio"/> | <input type="radio"/> | <input type="radio"/>                | <input type="radio"/> | <input type="radio"/> | <input type="radio"/>       |
| I often feel uncomfortable when working with opioid users.                                 | <input type="radio"/>    | <input type="radio"/> | <input type="radio"/> | <input type="radio"/>                | <input type="radio"/> | <input type="radio"/> | <input type="radio"/>       |
| All in all I am inclined to feel I am a failure with opioid users.                         | <input type="radio"/>    | <input type="radio"/> | <input type="radio"/> | <input type="radio"/>                | <input type="radio"/> | <input type="radio"/> | <input type="radio"/>       |





VA Stepped Care for Opioid Use Disorder Train-the-Trainer (SCOUTT) Initiative - Follow Up Survey

35. Please estimate the amount of time you spend identifying and/or talking to a patient who needs treatment for OUD? (**minutes per patient**)

36. Before SCOUTT, did you provide OUD-related care?

- Yes
- No

VA Stepped Care for Opioid Use Disorder Train-the-Trainer (SCOUTT) Initiative - Follow Up Survey

37. How has SCOUTT affected the amount of time you spend providing OUD-related care?

- Reduced
- Increased
- Don't Know

VA Stepped Care for Opioid Use Disorder Train-the-Trainer (SCOUTT) Initiative - Follow Up Survey

38. Please estimate how much time is being **SAVED** per patient per visit?

- 0-10 minutes
- 11-20 minutes
- 21-30 minutes
- 31-60 minutes
- 60+ minutes
- Don't Know

VA Stepped Care for Opioid Use Disorder Train-the-Trainer (SCOUTT) Initiative - Follow Up Survey

39. Please estimate how much **MORE** time is being spent per patient per visit?

- 0-10 minutes
- 11-20 minutes
- 21-30 minutes
- 31-60 minutes
- 60+ minutes
- Don't Know

VA Stepped Care for Opioid Use Disorder Train-the-Trainer (SCOUTT) Initiative - Follow Up Survey

40. How much time do you spend providing OUD-related care **per patient per visit**?

- 0-10 minutes
- 11-20 minutes
- 21-30 minutes
- 31-60 minutes
- 60+ minutes
- Don't Know

VA Stepped Care for Opioid Use Disorder Train-the-Trainer (SCOUTT) Initiative - Follow Up Survey

41. How many providers at your facility have you trained?

42. Please estimate the amount of time you spend training providers at your facility? (**minutes per provider**)

VA Stepped Care for Opioid Use Disorder Train-the-Trainer (SCOUTT) Initiative - Follow Up Survey

43. Please describe your experience with SCOUTT facilitation activities?

*For example: SCOUTT monthly calls, [SharePoint site](#), site visits, working with the facilitation team (Dr. Princess Ackland, Dr. Hildi Hagedorn, Marie Kenny, Dr. Amanda Midboe, Dr. Adam Gordon and/or Dr. Karen Drexler)*
